# Supplementary material
Source: MDPI journal article supplement (https://www.mdpi.com/2072-4292/14/16/4040)

**Figure S1.** Diameter size distributions of live trees from old (black bars) and young (grey bars) stands

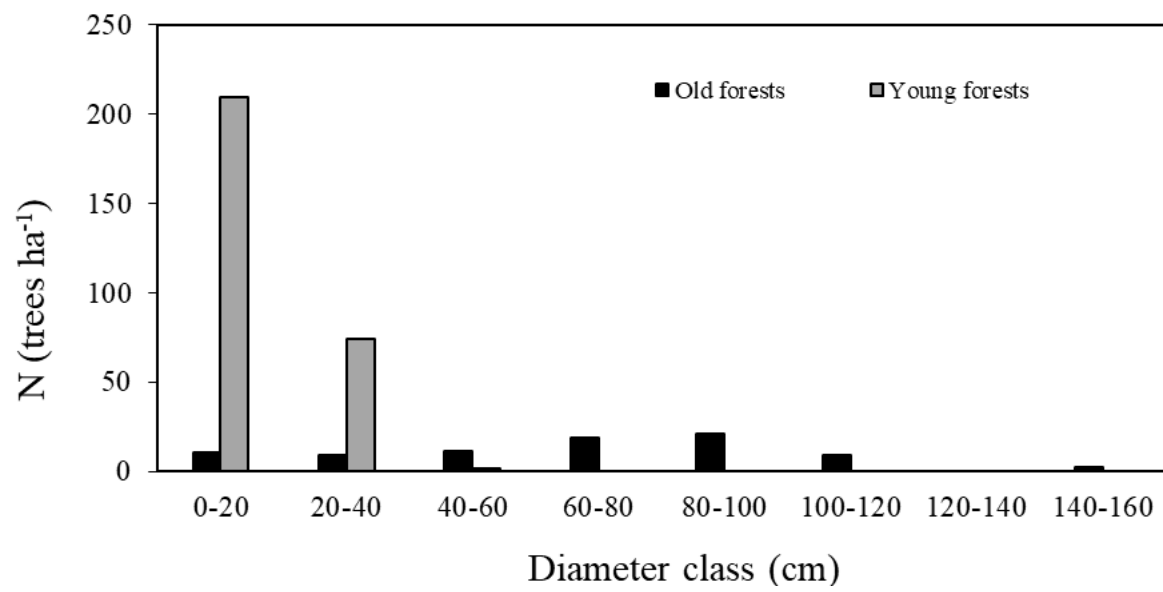

Supplement: s1 [file s1 › SupplementaryMaterial1_RemoteSensing.pdf]
