# Supplementary material
Source: MDPI journal article supplement (https://www.mdpi.com/2072-4292/14/16/4040)

**Figure S2.** Old Growth Indices (OGIs) for each OGI type calculated in the study area. Normal (blue line) and Kernel Density (red dashed line) of the distribution of each index. The structural variables included in each OGI type are described in Table 1

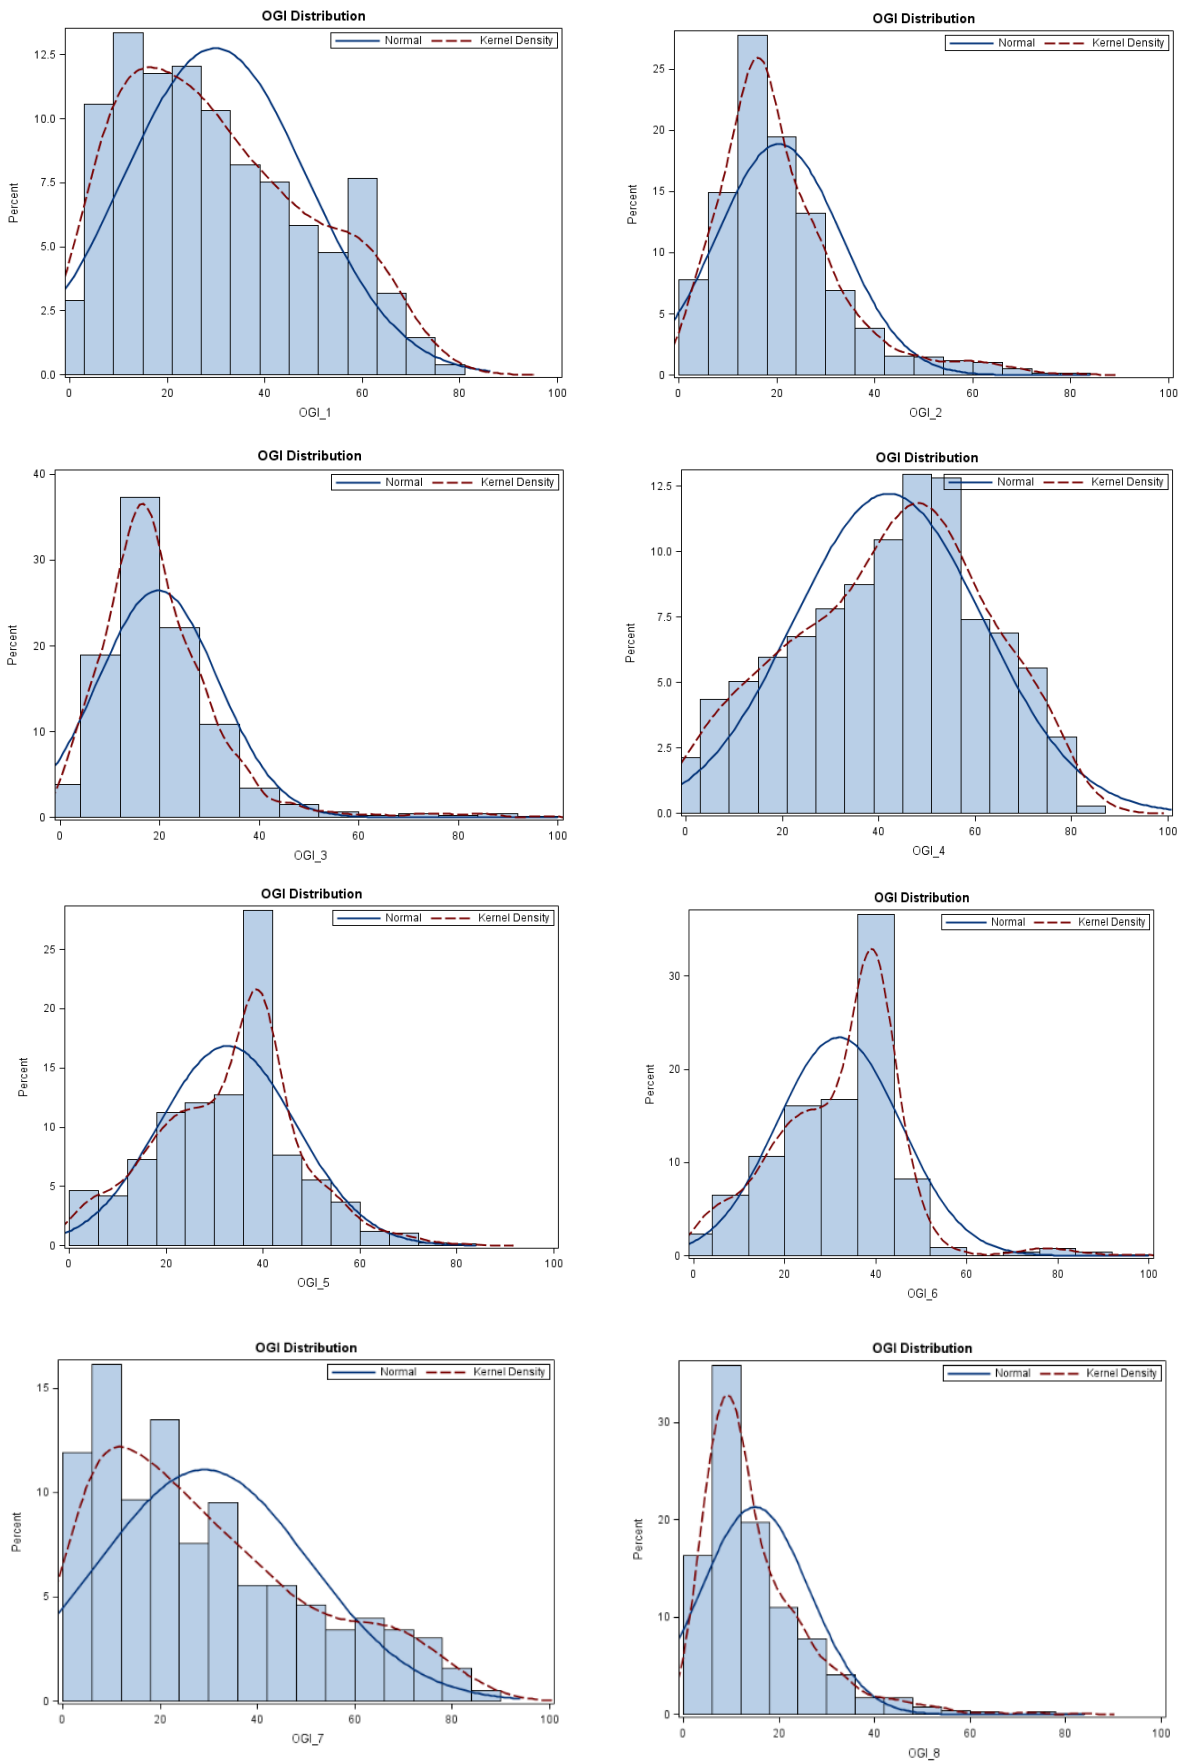

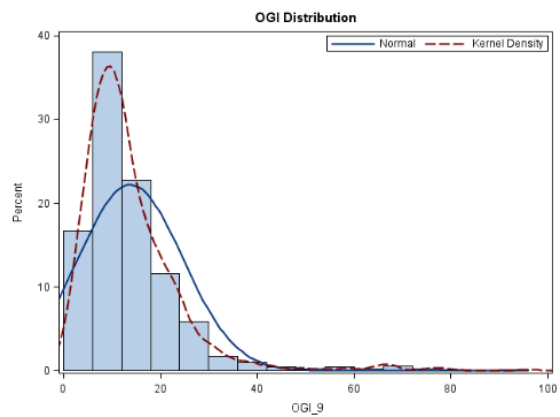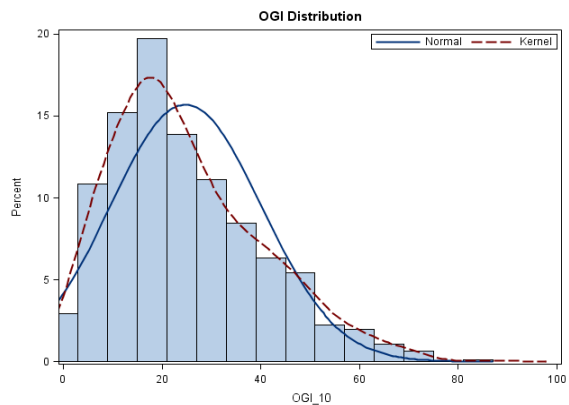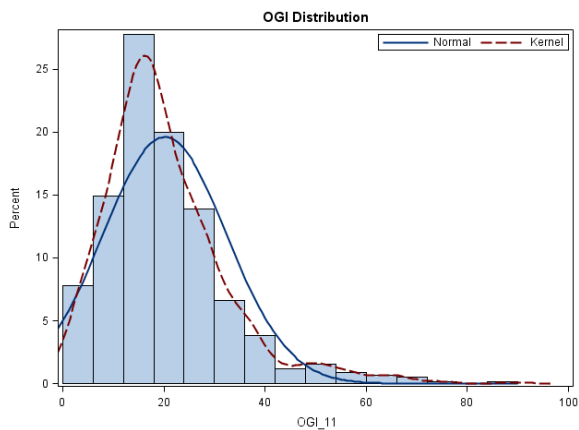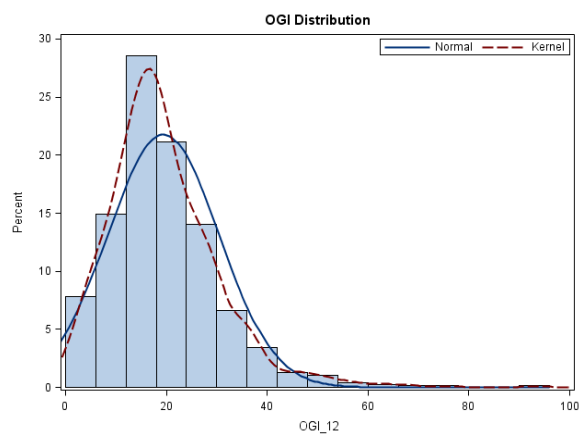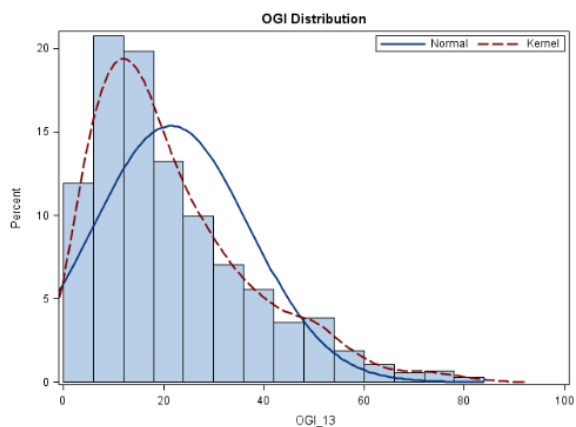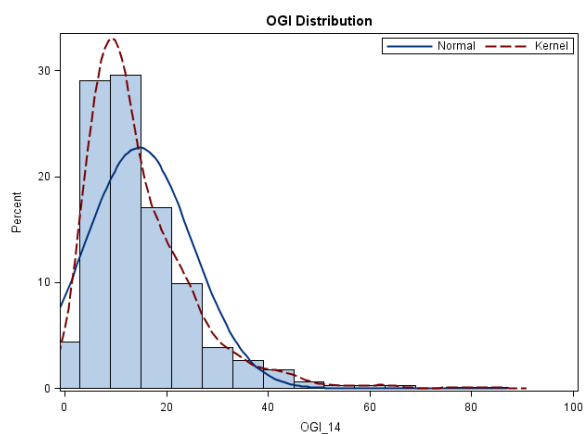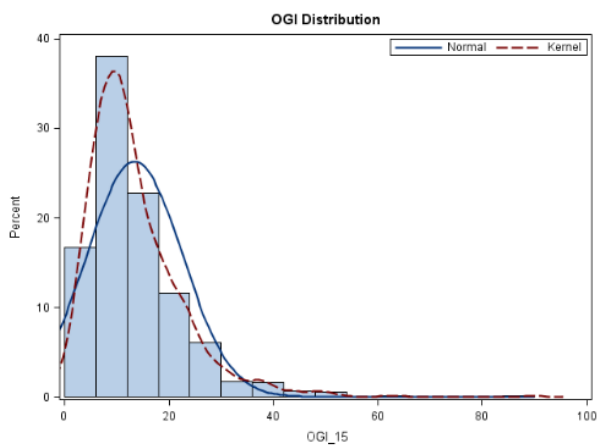

Supplement: s1 [file s1 › SupplementaryMaterial2_RemoteSensing.pdf]
